# Supplementary material for: Waggawagga-CLI: A command-line tool for predicting stable single α-helices (SAH-domains), and the SAH-domain distribution across eukaryotes
Source: PubMed Central journal article supplement (PMC5812594; doi:10.1371/journal.pone.0191924), 2018-02-14
Supplement: pone.0191924.s001.pdf [file pone.0191924.s001.pdf]

Marqusee S, Baldwin RL. Helix stabilization by Glu-. . .Lys+ salt bridges in short peptides of de novo design. *Proc Natl Acad Sci.* **1987**; 84: 8898-8902

|     |     |                                   | -[θ]222 |                                             |
|-----|-----|-----------------------------------|---------|---------------------------------------------|
| i+4 | E,K | A E A A A K E A A A K E A A A K A | 29,000  | helix content<br>(pH 7.0, 1°C, 0.01 M NaCl) |
| i+4 | K,E | A K A A A E K A A A E K A A A E A | 25,300  |                                             |
| i+3 | E,K | A E A A K A E A A K A E A A K A   | 17,600  |                                             |
| i+3 | K,E | A K A A E A K A A E A K A A E A   | 8,500   |                                             |

Huyghues-Despointes BM, Scholtz JM, Baldwin RL. Helical peptides with three pairs of Asp-Arg and Glu-Arg residues in different orientations and spacings. *Protein Sci.* **1993**; 2: 80-85

|     |     |                                   | -[θ]222 |                                             |
|-----|-----|-----------------------------------|---------|---------------------------------------------|
| i+4 | D,R | A D A A A R D A A A R D A A A R Y | 25,200  | helix content<br>(pH 7.0, 1°C, 0.01 M NaCl) |
| i+4 | R,D | A R A A A D R A A A R D A A A R Y | 16,300  |                                             |
| i+3 | D,R | A D A A R A D A A R A D A A R Y   | 14,000  |                                             |
| i+3 | R,D | A R A A D A R A A D A R A A D Y   | 2,200   |                                             |
| i+4 | E,R | A E A A A R E A A A R E A A A R Y | 31,300  |                                             |
| i+4 | R,E | A R A A A E R A A A E R A A A E Y | 22,400  |                                             |
| i+3 | E,R | A E A A R A E A A R A E A A R Y   | 22,500  |                                             |
| i+3 | R,E | A R A A E A R A A E A R A A E Y   | 11,800  |                                             |

Scholtz JM, Qian H, Robbins VH, Baldwin RL. The energetics of ion-pair and hydrogen-bonding interactions in a helical peptide. *Biochemistry.* **1993**; 32: 9668-9676

|     |     |                                 | ΔG° (E <sup>-</sup> K <sup>+</sup> ) | ΔG° (E <sup>0</sup> K <sup>+</sup> ) |                               |
|-----|-----|---------------------------------|--------------------------------------|--------------------------------------|-------------------------------|
| i+4 | Q,E | A A Q A A A E Q A A A A Q A A Y | -340                                 | -380                                 | Interactions<br>(0.01 M NaCl) |
| i+4 | Q,E | A A Q A A A A Q A A A E Q A A Y | -270                                 | -300                                 |                               |
| i+1 | E,K | A A Q A E K A Q E A A A Q A A Y | 200                                  | 0                                    |                               |
| i+2 | E,K | A A Q A E A K Q A A E A Q A A Y | 180                                  | -95                                  |                               |
| i+3 | E,K | A A Q A A E A Q K A A E Q A A Y | -380                                 | -285                                 |                               |
| i+4 | E,K | A A Q A A E A Q A K A A Q E A Y | -470                                 | -340                                 |                               |
| i+3 | K,E | A A Q A A K A Q E A A E Q A A Y | -460                                 | -320                                 |                               |
| i+4 | K,E | A A Q A A K A Q A E A A Q E A Y | -380                                 | -290                                 |                               |

Smith JS, Scholtz JM. Energetics of polar side-chain interactions in helical peptides: salt effects on ion pairs and hydrogen bonds. *Biochemistry.* **1998**; 37: 33/40

|     |     |                                 | -[θ]222 | ΔG° (E <sup>-</sup> K <sup>+</sup> ) |                                                    |
|-----|-----|---------------------------------|---------|--------------------------------------|----------------------------------------------------|
| i+3 | E,K | A A Q A A E A Q K A A A Q A A Y | 11,400  | -290                                 | helix content<br>(0°C, 0.01 M NaCl,<br>pH 5.5/7.0) |
| i+4 | E,K | A A Q A A E A Q A K A A Q A A Y | 12,750  | -415                                 |                                                    |
| i+5 | E,K | A A Q A A E A Q A A K A Q A A Y | 8,500   |                                      |                                                    |
| i+3 | K,E | A A Q A A K A Q E A A A Q A A Y | 9,000   | -280                                 |                                                    |
| i+4 | K,E | A A Q A A K A Q A E A A Q A A Y | 10,350  | -400                                 |                                                    |
| i+5 | K,E | A A Q A A K A Q A A E A Q E A Y | 6,900   |                                      |                                                    |
| i+3 | D,K | A A Q A A D A Q K A A A Q A A Y | 8,200   | -120                                 |                                                    |
| i+4 | D,K | A A Q A A D A Q A K A A Q A A Y | 9,200   | -240                                 |                                                    |
| i+5 | D,K | A A Q A A D A Q A A K A Q A A Y | 7,400   |                                      |                                                    |
| i+3 | K,D | A A Q A A K A Q D A A A Q A A Y | 8,400   | -400                                 |                                                    |
| i+4 | K,D | A A Q A A K A Q A D A A Q A A Y | 10,300  | -580                                 |                                                    |
| i+5 | K,D | A A Q A A K A Q A A D A Q E A Y | 5,800   |                                      |                                                    |
| i+3 | E,H | A A Q A A E A Q H A A A Q A A Y | 4,500   | -300                                 |                                                    |
| i+4 | E,H | A A Q A A E A Q A H A A Q A A Y | 4,100   | -190                                 |                                                    |
| i+5 | E,H | A A Q A A E A Q A A H A Q A A Y | 3,600   |                                      |                                                    |
| i+3 | H,E | A A Q A A H A Q E A A A Q A A Y | 4,400   | -500                                 |                                                    |
| i+4 | H,E | A A Q A A H A Q A E A A Q A A Y | 5,300   | -650                                 |                                                    |
| i+5 | H,E | A A Q A A H A Q A A E A Q E A Y | 2,300   |                                      |                                                    |

## Waggawagga scoring

### Stabilization / destabilization by amino acid interactions

| Source residue                                         | Target residue | Interaction | Score | Stabilization |
|--------------------------------------------------------|----------------|-------------|-------|---------------|
| H/K/R                                                  | E              | i+4         | 1.0   | strong        |
| E                                                      | K/R            | i+4         | 1.0   | strong        |
| H/K/R                                                  | E              | i+3         | 0.75  | medium        |
| E                                                      | K/R            | i+3         | 0.75  | medium        |
| K/R                                                    | D              | i+4         | 0.75  | medium        |
| K/R                                                    | D              | i+3         | 0.5   | weak          |
| D                                                      | K/R            | i+4         | 0.75  | medium        |
| D                                                      | K/R            | i+3         | 0.5   | weak          |
| E                                                      | H              | i+3         | 0.5   | weak          |
| Q                                                      | E              | i+4; i+3    | 0.5   | weak          |
| E                                                      | Q              | i+4; i+3    | 0.5   | weak          |
| network stabilization<br>(oppositely charged residues) |                | i, i+3, i+6 | 1.5   | network       |
|                                                        |                | i, i+3, i+7 | 0.25  | network       |
|                                                        |                | i, i+4, i+7 | 0.25  | network       |
|                                                        |                | i, i+4, i+8 | 2.0   | network       |
| hydrophobic seam                                       |                | i, i+3, i+6 | -0.5  | destabilizing |
|                                                        |                | i, i+3, i+7 | -0.5  | destabilizing |
|                                                        |                | i, i+4, i+7 | -0.5  | destabilizing |
|                                                        |                | i, i+4, i+8 | -0.5  | destabilizing |

### Stabilization / destabilization by helix-forming propensity

| Residue | Score | Stabilization |
|---------|-------|---------------|
| A       | 0.25  | stabilizing   |
| G       | -0.5  | destabilizing |
| P       | -0.75 | destabilizing |
